# Supplementary material for: Targeting Extracellular DNA to Deliver IGF-1 to the Injured Heart
Source: PubMed Central journal article supplement — Sci Rep. 2014 Mar 7;4:4257. doi: 10.1038/srep04257 (PMC3945489; doi:10.1038/srep04257), 2014-03-07
Supplement: srep04257-s1.pdf [file srep04257-s1.pdf]

## Targeting Extracellular DNA to Deliver IGF-1 to the Injured Heart

Raffay S. Khan<sup>1</sup>, Mario D. Martinez<sup>2</sup>, Jay C. Sy<sup>2</sup>, Karl D. Pendergrass<sup>1</sup>, Pao-lin Che<sup>2</sup>, Milton E. Brown<sup>1, 2</sup>, E. Bernadette Cabigas<sup>2</sup>, Madhuri Dasari<sup>2</sup>, Niren Murthy<sup>2,3</sup>, Michael E. Davis<sup>1,2,3,4,\*</sup>

<sup>1</sup> Division of Cardiology, Emory University, Atlanta, Georgia 30322, USA

<sup>2</sup> Wallace H. Coulter Department of Biomedical Engineering, Emory University and Georgia Institute of Technology, Atlanta, Georgia 30322, USA.

<sup>3</sup> Department of Bioengineering, University of California at Berkeley, Berkeley, CA, 94720, USA

<sup>4</sup> Emory+Children's Center for Cardiovascular Biology, Children's Healthcare of Atlanta, Atlanta, GA 30332, USA

\* To whom correspondence should be addressed:

Michael E. Davis, PhD

The Wallace H. Coulter Department of Biomedical Engineering

Emory University and Georgia Institute of Technology

101 Woodruff Circle, Suite 2001, Atlanta, GA 30322, USA

E-mail: [michael.davis@bme.emory.edu](mailto:michael.davis@bme.emory.edu)

**Supplemental Data**

# Supplemental Figure 1

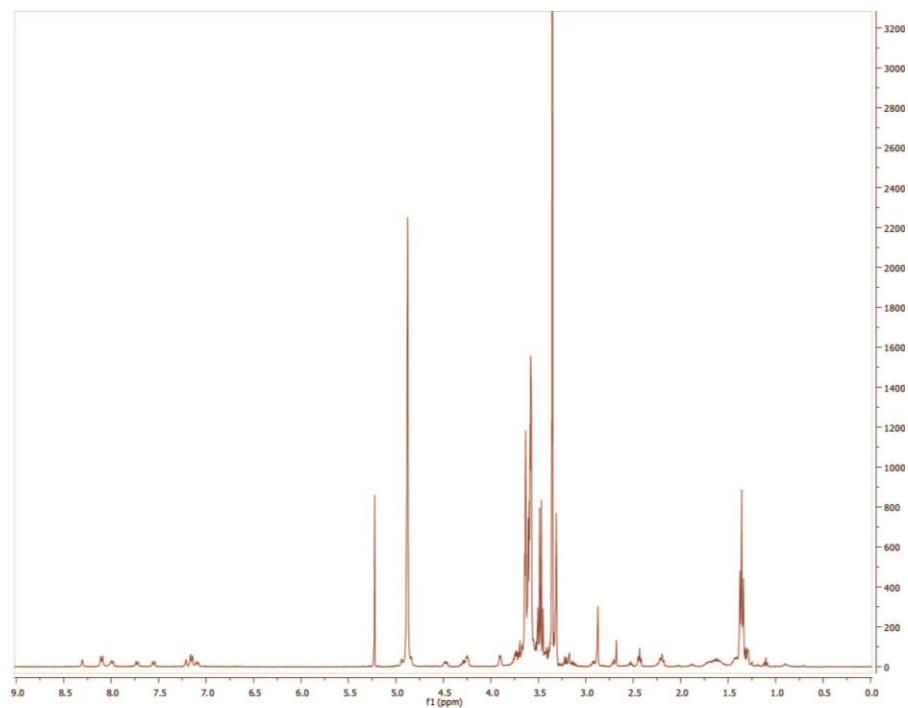

## Supplemental Figure 2

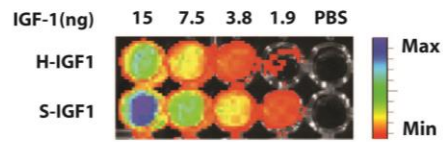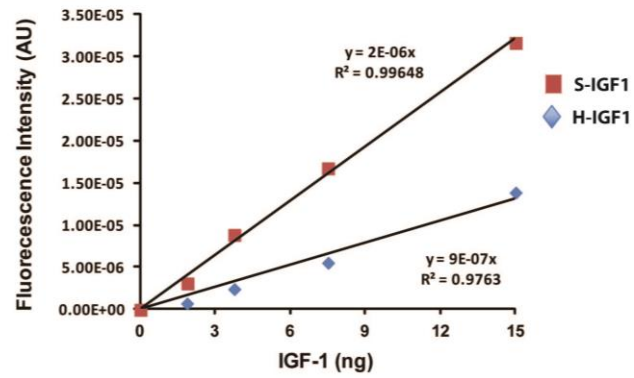

### Supplemental Figure 3

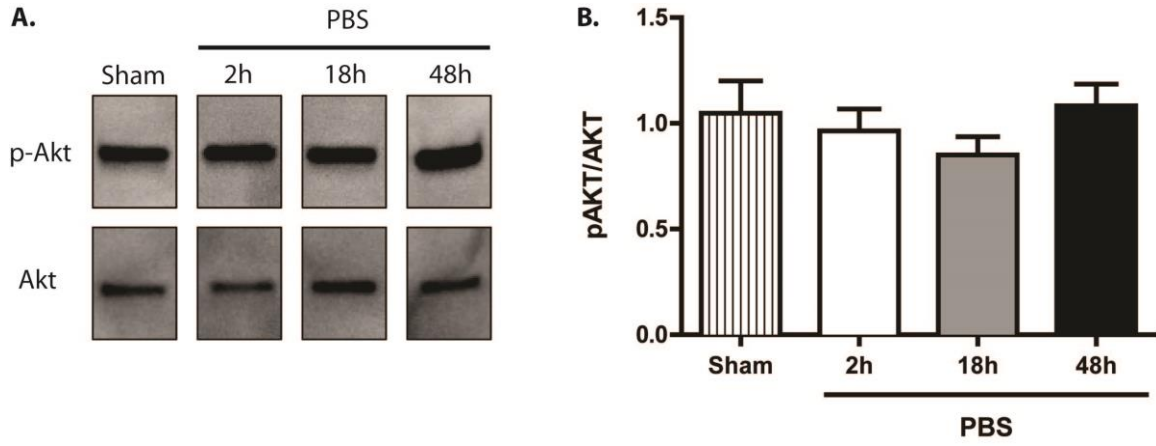

Supplemental Figure 4

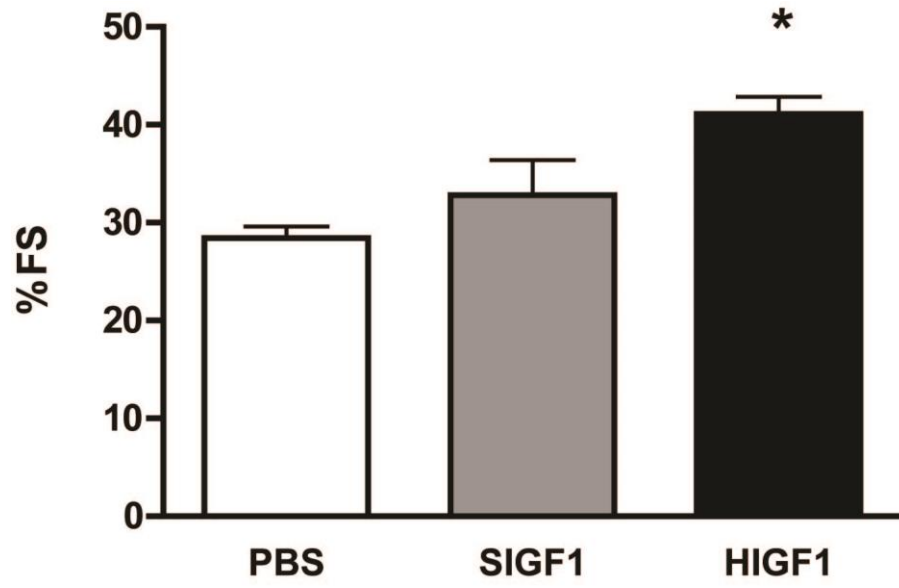

## Supplemental Figure Legends

### Figure 1: **Hoechst-Biotin Nuclear Magnetic Resonance (NMR) spectra.**

Hoechst-biotin was characterized by  $^1\text{H-NMR}$  (400 MHz,  $\text{CD}_3\text{OD}$ ) by tracking aromatic Hoechst Protons ( $\delta$  8.10, d, 8.68 Hz, 2H;  $\delta$  7.99, d, 9.5 Hz, 2H;  $\delta$  7.73, d, 8.68 Hz, 1H;  $\delta$  7.55, d, 9.5 Hz, 1H;  $\delta$  7.15, m, 4H) to Biotin protons ( $\delta$  4.48, m, 1H;  $\delta$  4.30, m, 1H;  $\delta$  2.68, m, 1H;  $\delta$  2.20, t, 8.74 Hz, 2H).

### Figure 2: **Hoechst-IGF-1 (H-IGF1) and Streptavidin-IGF-1 (S-IGF1) standard curves.**

Differences in fluorescence efficiencies between H-IGF1 and S-IGF1 were accounted for by generating standard curves. Known amounts of H-IGF1 and S-IGF1, as measured by ELISA were added to a 96-well plate and imaged using a fluorescence-imaging camera (Xenogen IVIS 200 camera) with the same settings used to image harvested tissues. Fluorescence efficiency was measured and plotted against IGF-1 to generate standard curves for both H-IGF1 and S-IGF1. Compared to equal amounts of H-IGF1, S-IGF1 had considerably greater fluorescence efficiency.

### Figure 3: **No changes in Akt phosphorylation between sham and PBS-**

**treated mice following ischemia-reperfusion.** Proteins were extracted from animals subject to sham surgery or ischemia-reperfusion for the indicated time and Western analysis was performed for both phospho- and total Akt. Bands were quantified and expressed as a ratio of phospho-to-total (p-Akt/Akt).

Representative blots and grouped data demonstrate no difference in Akt phosphorylation in any control group (n=4 per group).

Figure 4: **H-IGF1 preserves cardiac function two weeks following ischemia-reperfusion.** Echocardiography was used to measure cardiac contractility in PBS, S-IGF1 and H-IGF1 treated mice. Percent fractional shortening (%FS), an index of systolic function, was significantly greater in H-IGF1 treated mice compared to S-IGF1 and PBS treated mice (n=7-11 per group, \*,  $p < 0.05$  vs. S-IGF1, one-way ANOVA followed by Tukey's post-test).
